# Supplementary material
Source: PubMed Central journal article supplement (PMC6830304)
Supplement: NIHMS997400-supplement-Supplemental_Figures_and_Tables.pdf [file NIHMS997400-supplement-Supplemental_Figures_and_Tables.pdf]

### **Supplementary Figure legends**

**Supplementary Table 1:** *SPOP* mutations identified in this CRPC cohort. Mutations, which have not been previously described in prostate cancer are highlighted in red.

**Supplementary Table 2:** Baseline prognostic factors from start of abiraterone for CHD1 IHC negative or positive CRPC patients.

**Supplementary Figure 1: A)** Schematic summary of patient samples (HSPC, CRPC) analyzed by IHC and targeted NGS.

**Supplementary Figure 2: A)** Micrographs (20x) of tissue sections analyzed for CHD1 and PTEN expression. Both patients show co-occurring loss of CHD1 and PTEN. **B)** Histogram summarizing the distribution of mutated residues in the *SPOP* protein in three different CRPC cohorts. View focuses only on the affected amino acids spanning the MATH protein domain. RMH – Royal Marsden (this cohort), SU2C – SU2C/ PCF initiative for advanced prostate cancer, FRED – Fred Hutchinson Cancer Research Center cohort. **C)** CHD1 expression increases with tumor progression. H-scores of patient-matched HSPC and CRPC biopsies are shown (n=56, HSPC median: 65 (IQR: 30-88), CRPC median: 80 (IQR: 33-100), Wilcoxon signed-rank test p-value=0.010). **D, E)** Shannon indices based on 5p (F) and 5q (G) FISH probes alone. P-values were calculated using unpaired t-test.

**Supplementary Figure 3:** Combined *SPOP* mutation and CHD1 loss by IHC status predict better and longer response to abiraterone (A, B). C) Waterfall plot showing increased PSA responses from start of abiraterone in CHD1<sup>LOSS</sup> plus *SPOP*<sup>MUT</sup> versus CHD1<sup>WT</sup> plus *SPOP*<sup>WT</sup> tumors. Each bar represents PSA nadir from start of treatment for an individual patient. Dashed line indicates PSA fall by 50%. PSA nadir data were available for 37 patients with known *SPOP* status. P=0.023, 2-side Fisher's exact test.

# Supplementary Figure 1

A

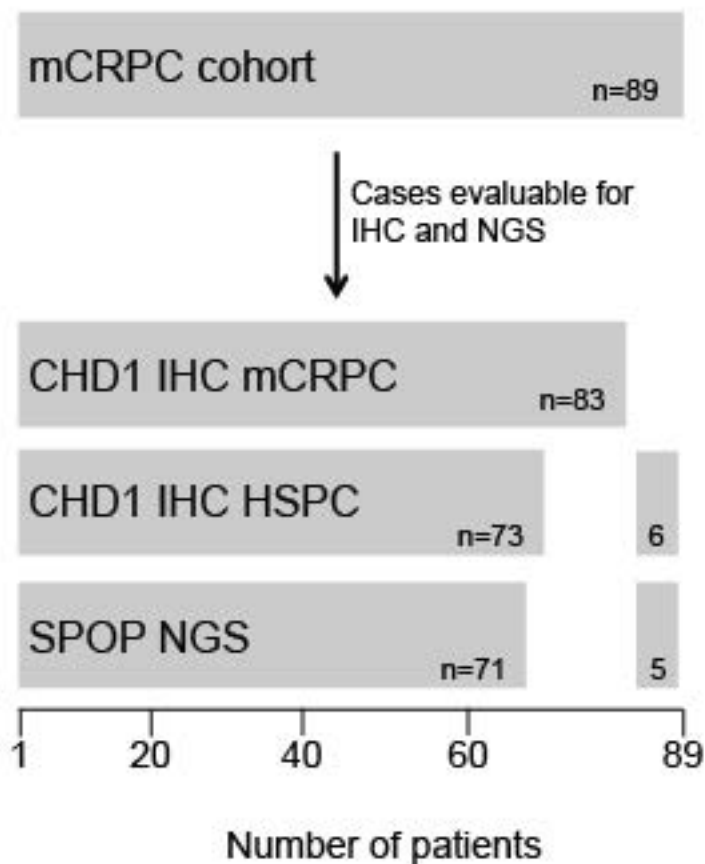

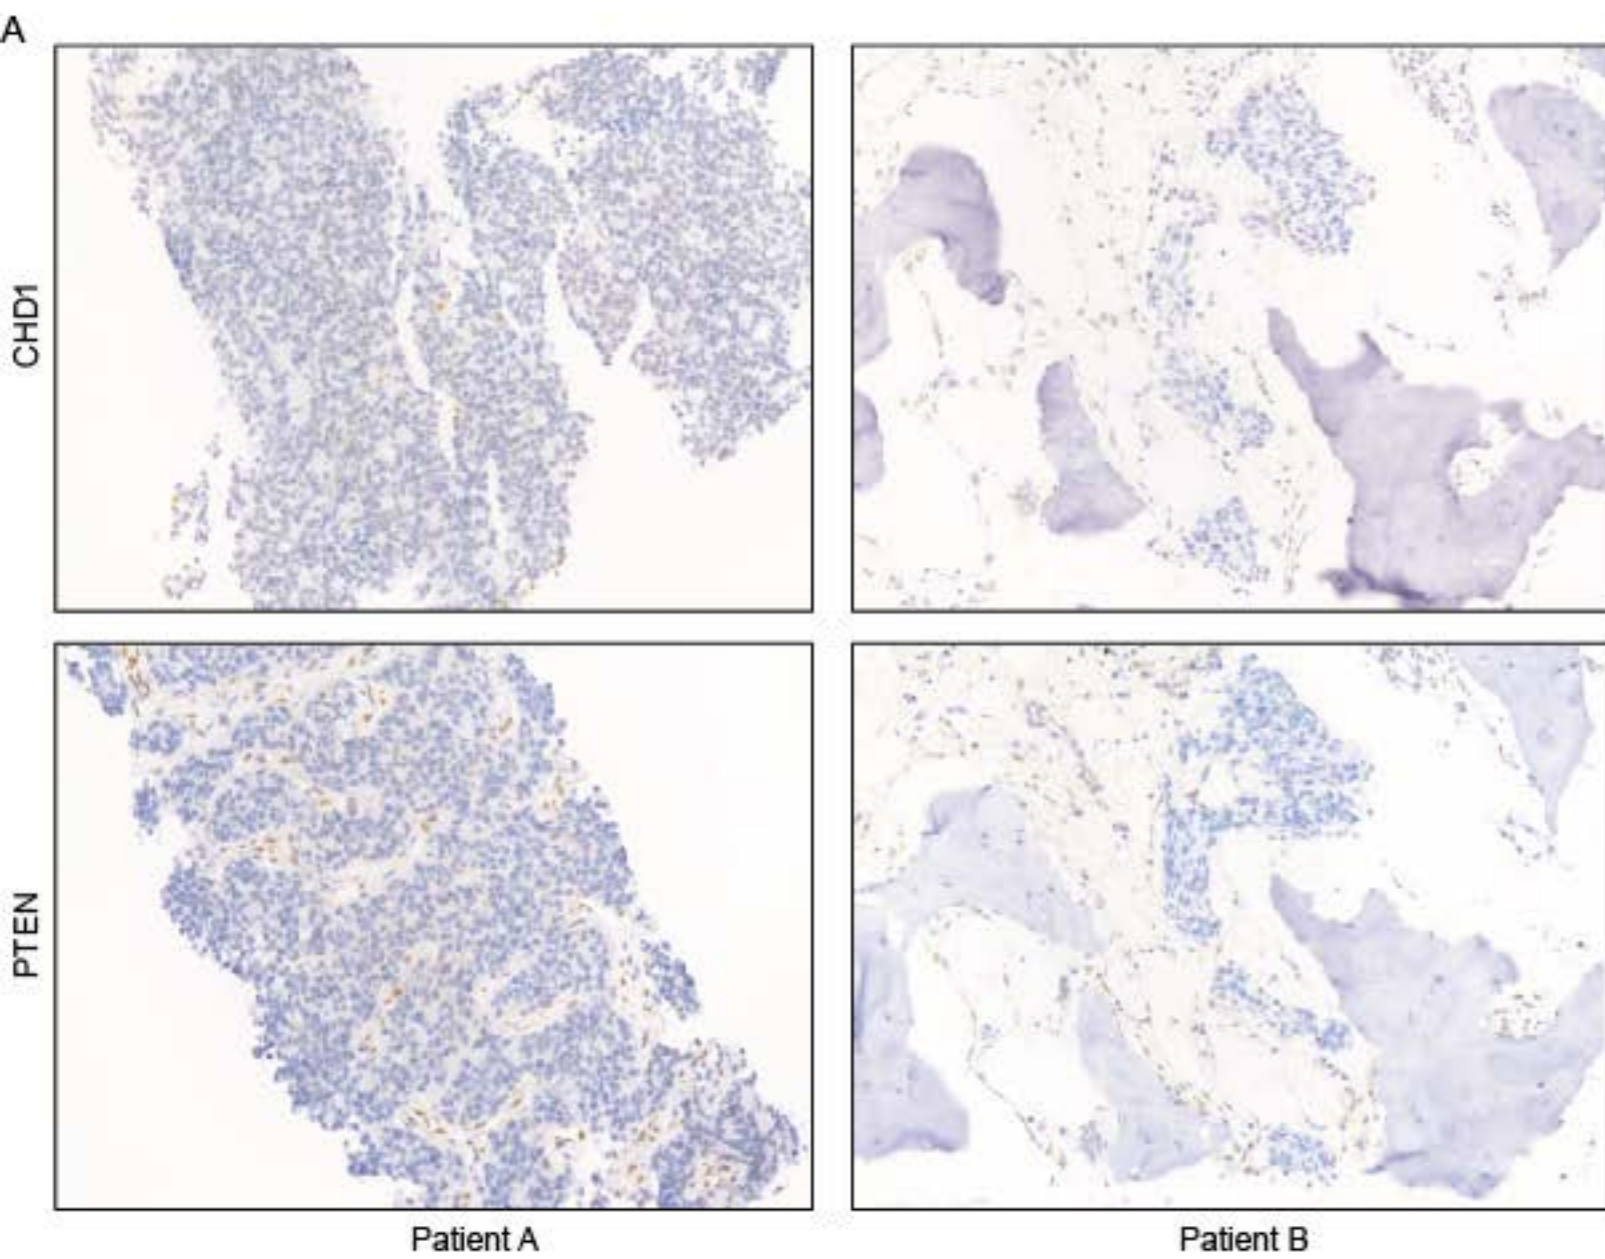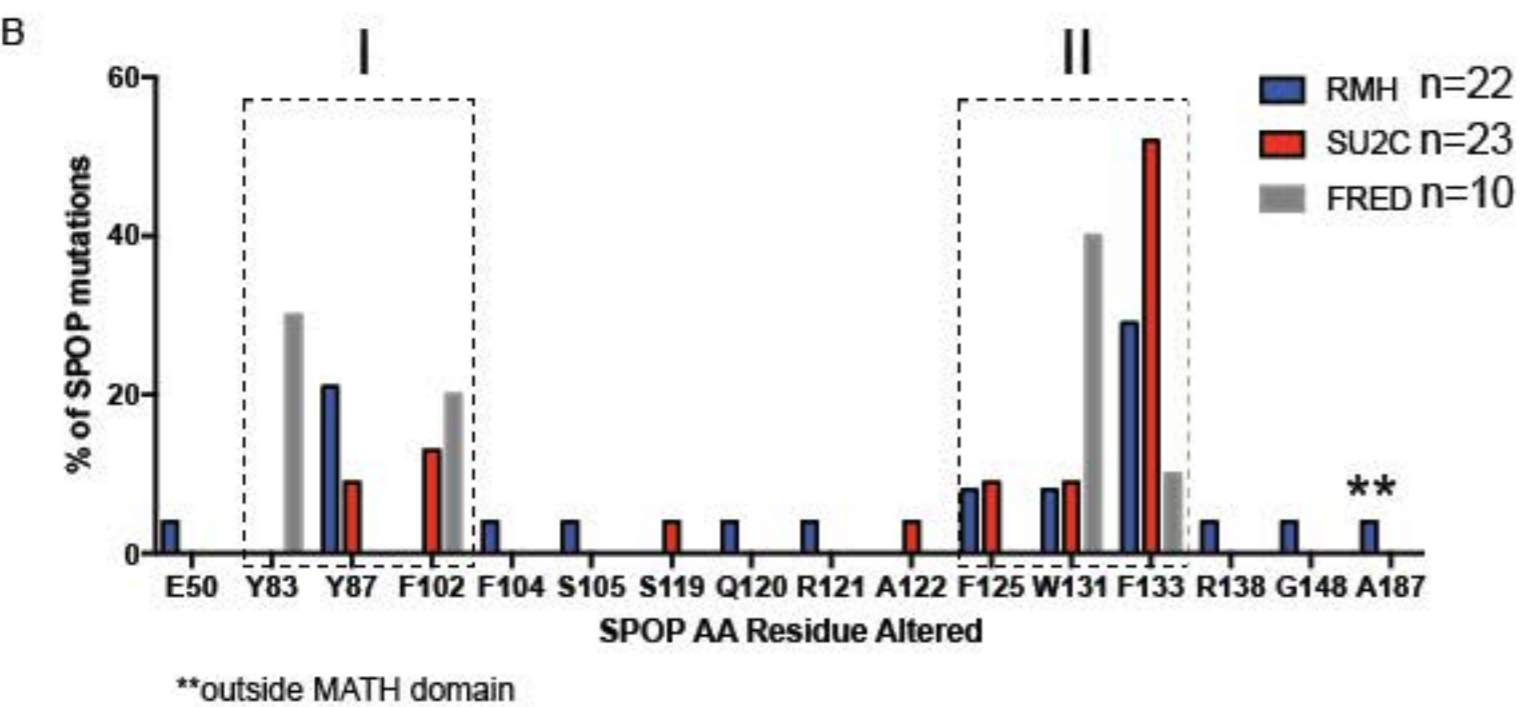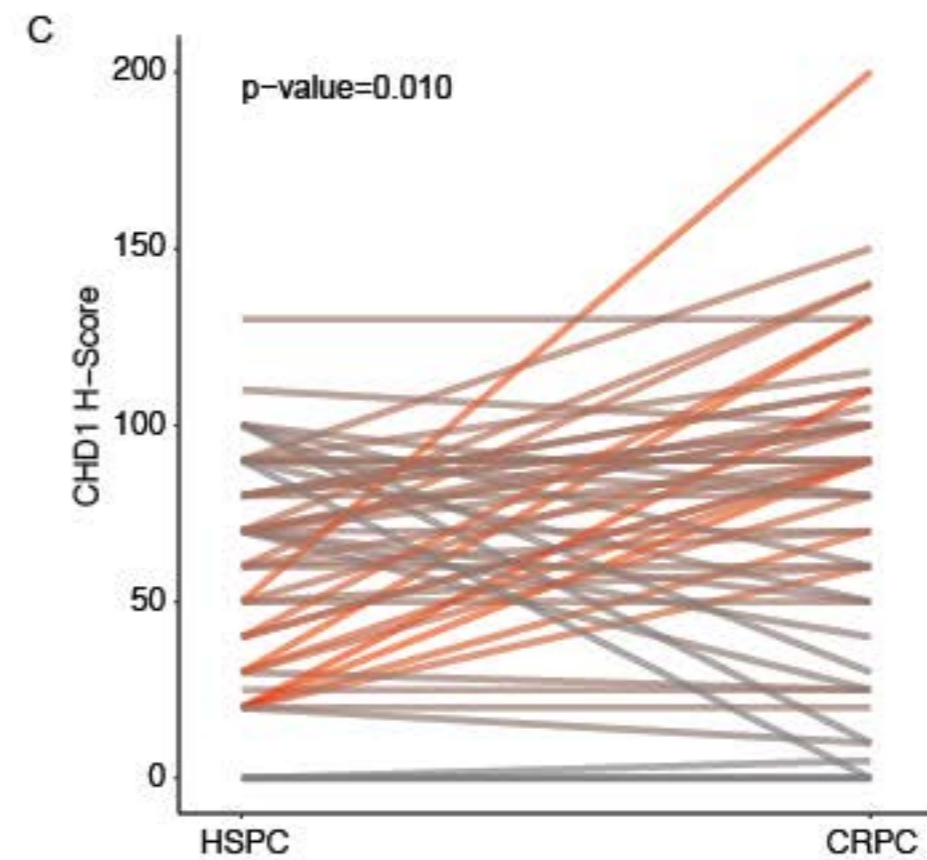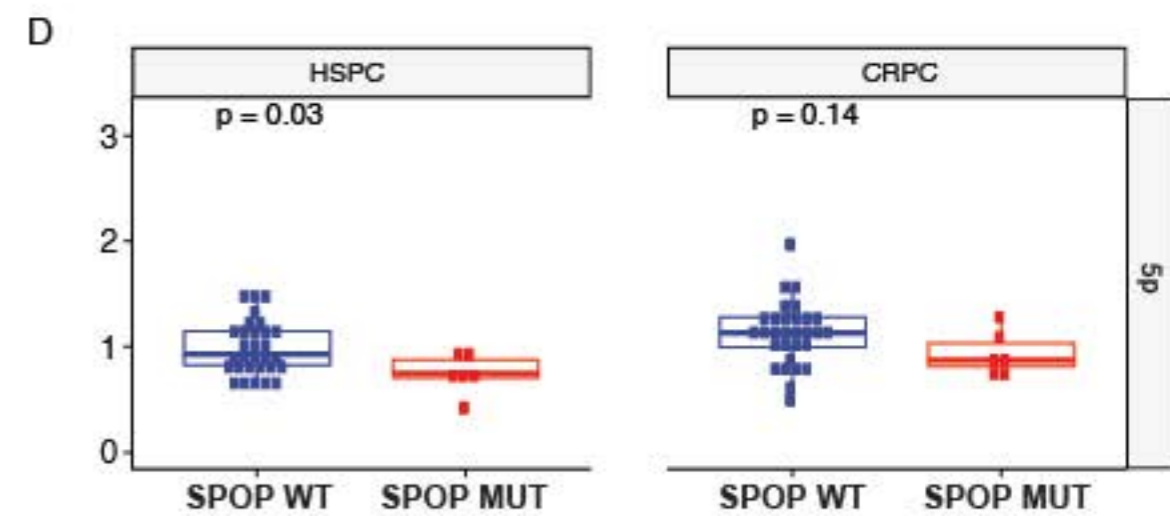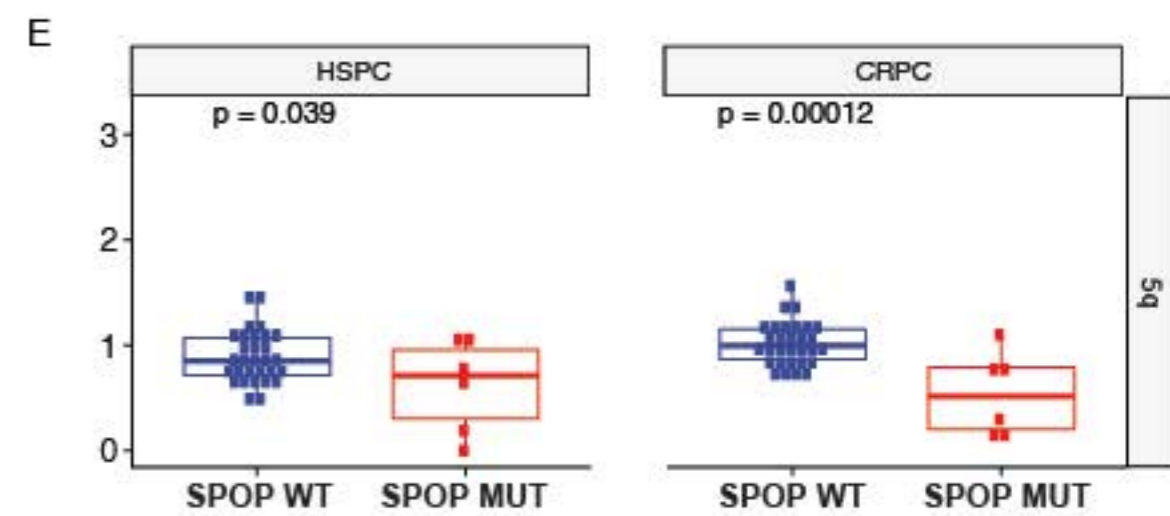

# Supplementary Figure 3

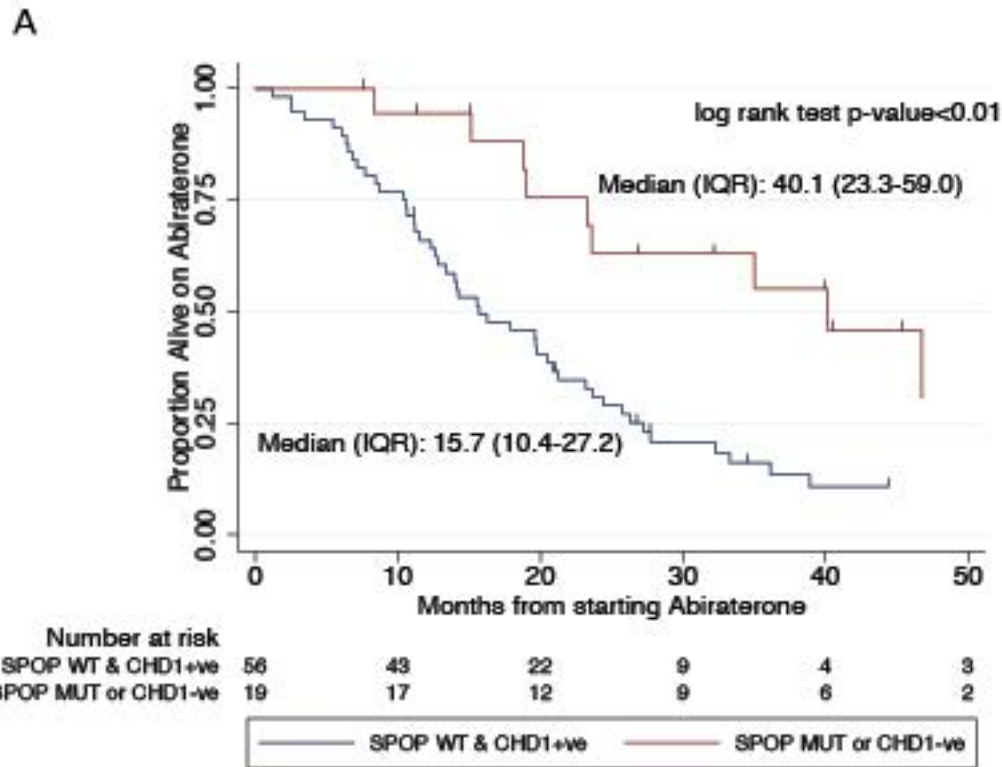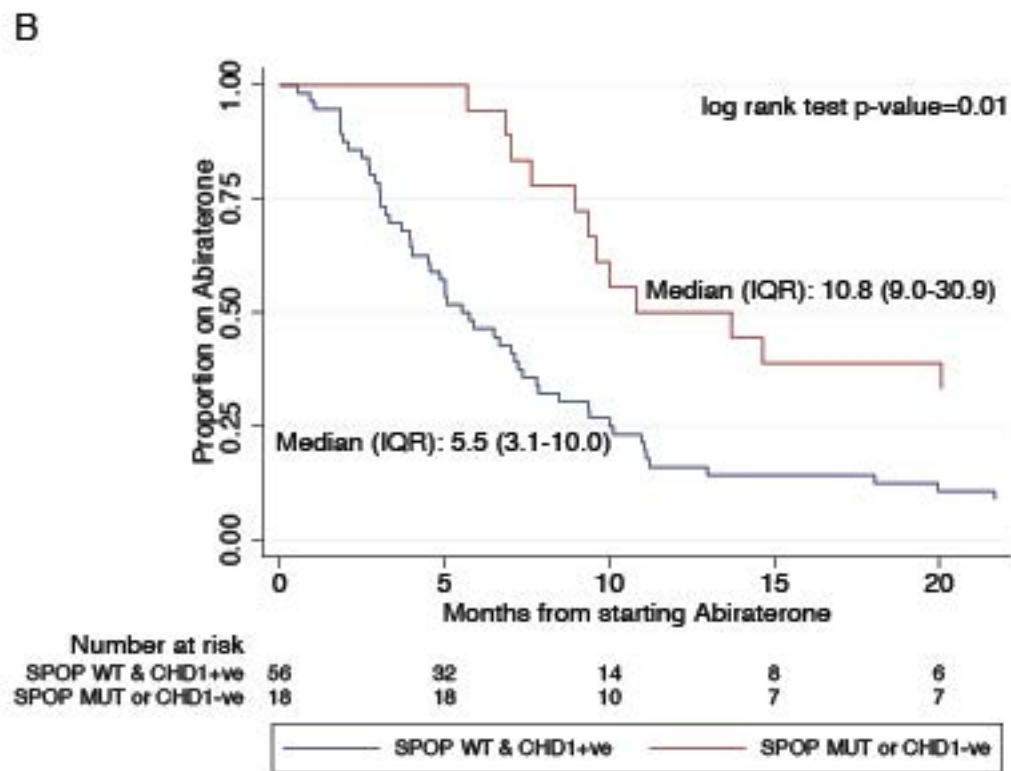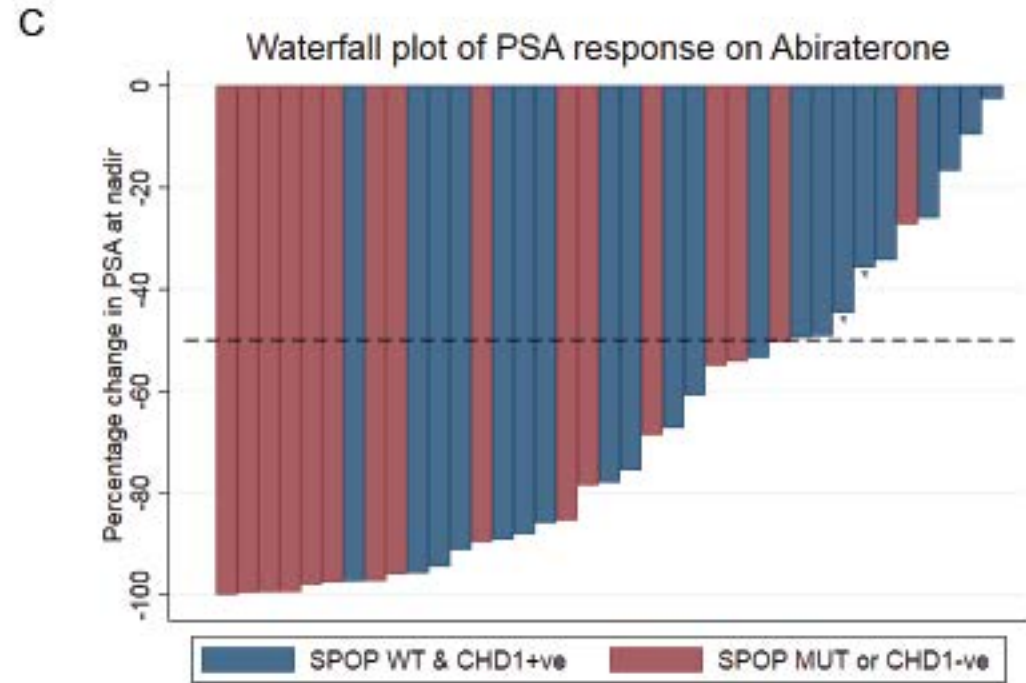

Supplementary Table 1: SPOP mutations identified in this cohort

| Sample ID | Protein Change     | Codon Change          | COSMIC ID                 | HSPC | CRPC  |
|-----------|--------------------|-----------------------|---------------------------|------|-------|
| PT1       | p.A187T            | c.559G>A              | N/A                       | N/A  | yes   |
| PT2       | p.F133S*, p.E50K** | c.398T>C*, c.148G>A** | COSM247573*, COSM980818** | yes* | yes** |
| PT3       | p.F104S            | c.311T>C              | COSM3672491               | N/A  | yes   |
| PT4       | p.F125C            | c.374T>G              | N/A, SU2C (425)           | N/A  | yes   |
| PT5       | p.F125L            | c.375T>A              | COSM242643                | N/A  | yes   |
| PT6       | p.F133C            | c.398T>G              | COSM242645                | yes  | yes   |
| PT7       | p.F133L            | c.399C>G              | COSM95272                 | yes  | N/A   |
| PT8       | p.F133L            | c.399C>G              | COSM95272                 | yes  | N/A   |
| PT9       | p.F133L            | c.399C>G              | COSM95272                 | N/A  | yes   |
| PT10      | p.F133V            | c.397T>G              | COSM219965                | yes  | yes   |
| PT11      | p.F133V            | c.397T>G              | COSM219965                | N/A  | yes   |
| PT12      | p.F133L            | c.399C>G              | COSM95272                 | N/A  | yes   |
| PT13      | p.G148E            | c.443G>A              | N/A                       | no   | yes   |
| PT14      | p.Q120R            | c.359A>G              | N/A                       | N/A  | yes   |
| PT15      | p.R121P            | c.362G>C              | N/A                       | N/A  | yes   |
| PT16      | p.S105F            | c.314C>T              | N/A                       | N/A  | yes   |
| PT17      | p.W131C            | c.393G>C              | N/A, TCGA prostate        | yes  | yes   |
| PT18      | p.W131C            | c.393G>C              | N/A, TCGA prostate        | N/A  | yes   |
| PT19      | p.Y87C             | c.260A>G              | COSM248681                | N/A  | yes   |
| PT20      | p.Y87C             | c.260A>G              | COSM248681                | yes  | yes   |
| PT21      | p.Y87N             | c.259T>A              | COSM242640                | yes  | yes   |
| PT22      | p.Y87S             | c.260A>C              | COSM241746                | N/A  | yes   |

\* found only in HSPC

\*\* found only in CRPC

# Supplementary Table 2: Baseline levels at start of abiraterone

|                                                     | <b>CHD1 negative in CRPC</b> | <b>CHD1 positive in CRPC</b> | <b>P-value</b> |
|-----------------------------------------------------|------------------------------|------------------------------|----------------|
| Baseline PSA, µg/l (median (IQR))                   | 104 (33.25-719.8)            | 143 (67-357)                 | p=0.76         |
| Baseline hemoglobin, g/dl (mean (±SD))              | 12.4 (±1.43)                 | 11.9 (±1.59)                 | p=0.47         |
| Baseline alkaline phosphatase, IU/l (median (IQR))  | 77.5 (58.5-127.8)            | 106 (68-227)                 | p=0.14         |
| Baseline lactate dehydrogenase, IU/l (median (IQR)) | 168 (151.5-260.5)            | 174 (155-248)                | p=0.83         |
| Baseline albumin, g/l (mean (±SD))                  | 38 (±4.34)                   | 35.86 (±4.27)                | p=0.25         |
|                                                     | <b>SPOP MUT in CRPC</b>      | <b>SPOP WT in CRPC</b>       | <b>P-value</b> |
| Baseline PSA, µg/l (median (IQR))                   | 207 (26.5-543)               | 136.5 (69.25-374)            | p=0.98         |
| Baseline hemoglobin, g/dl (mean (±SD))              | 12 (±1.37)                   | 11.8 (±1.47)                 | p=0.67         |
| Baseline alkaline phosphatase, IU/l (median (IQR))  | 68 (53.5-155)                | 123.5 (70.5-244.3)           | p=0.06         |
| Baseline lactate dehydrogenase, IU/l (median (IQR)) | 173 (143.5-234)              | 192 (154.3-296.3)            | p=0.47         |
| Baseline albumin, g/l (mean (SD))                   | 37.67 (±4.77)                | 35.18 (±4.83)                | p=0.17         |
